# Supplementary material
Source: HighWire-hosted journal article supplement (https://openheart.bmj.com/content/12/1/e003215)
Supplement: inline-supplementary-material-1 [file inline-supplementary-material-1.pdf]

**Supplementary Table S1: Detailed Search Strategy**

| Database                         | Search String                                                                                                                                                                                                                                                                                        |
|----------------------------------|------------------------------------------------------------------------------------------------------------------------------------------------------------------------------------------------------------------------------------------------------------------------------------------------------|
| PubMed MEDLINE<br>299 Results    | ((("Cardiomyopathy, Hypertrophic"[Mesh]) OR (Hypertrophic Cardiomyopathies)) OR (Hypertrophic Obstructive Cardiomyopathies)) OR (Hypertrophic Obstructive Cardiomyopathy)) AND (((((mavacamten) OR ("MYK-461" [Supplementary Concept])) OR (Aficamten)) OR (CK-274)) OR (Cardiac myosin inhibitors)) |
| clinicaltrials.gov<br>28 Results | Hypertrophic Cardiomyopathy   Aficamten OR Aficamten \ (CK-3773274\ ) (5 mg, 10 mg, 15 mg and 20 mg\ ) OR Mavacamten OR cardiac myosin inhibitor OR MYK-461                                                                                                                                          |
| Cochrane Library<br>96 Results   | Cardiomyopathy, Hypertrophic MeSH AND cardiac myosin inhibitor OR Mavacamten OR MYK-461 OR Aficamten OR CK-274 OR CK-3773274                                                                                                                                                                         |

**Supplementary Table S2: PICO Table, Inclusion & Exclusion Criteria**

|                           |                                                                                                                                                                                                                                                                                                                                                                                                                                                                                                                                           |
|---------------------------|-------------------------------------------------------------------------------------------------------------------------------------------------------------------------------------------------------------------------------------------------------------------------------------------------------------------------------------------------------------------------------------------------------------------------------------------------------------------------------------------------------------------------------------------|
| <b>Patient</b>            | Hypertrophic Cardiomyopathy                                                                                                                                                                                                                                                                                                                                                                                                                                                                                                               |
| <b>Intervention</b>       | Cardiac Myosin Inhibitors either Mavacamten or Aficamten                                                                                                                                                                                                                                                                                                                                                                                                                                                                                  |
| <b>Control</b>            | Placebo drug                                                                                                                                                                                                                                                                                                                                                                                                                                                                                                                              |
| <b>Outcome</b>            | <p>Primary outcomes:</p> <ul style="list-style-type: none"> <li>• change in resting LVOT gradient</li> <li>• change in post-Valsalva LVOT gradient</li> <li>• change in left ventricular ejection fraction (LVEF)</li> </ul> <p>Secondary outcomes:</p> <ul style="list-style-type: none"> <li>• change in N-terminal pro-B-type natriuretic peptide (NT-pro-BNP)</li> <li>• change in cardiac troponin I</li> <li>• proportion of patients achieving NYHA class improvement <math>\geq 1</math></li> <li>• change in KCCQ-CSS</li> </ul> |
| <b>Study Design</b>       | Randomized controlled trials                                                                                                                                                                                                                                                                                                                                                                                                                                                                                                              |
| <b>Inclusion Criteria</b> | <ul style="list-style-type: none"> <li>• RCTs having patients with hypertrophic cardiomyopathy.</li> <li>• RCTs with patients being treated with Cardiac Myosin Inhibitors either Mavacamten or Aficamten compared with placebo</li> </ul>                                                                                                                                                                                                                                                                                                |
| <b>Exclusion</b>          | <ul style="list-style-type: none"> <li>• Any observational study, retrospective cohort, conference paper and animal</li> </ul>                                                                                                                                                                                                                                                                                                                                                                                                            |

|          |                                                                                                                                                                                                                     |
|----------|---------------------------------------------------------------------------------------------------------------------------------------------------------------------------------------------------------------------|
| Criteria | <div>studies.</div> <ul style="list-style-type: none"><li>● Patients not having Cardiac Myosin Inhibitors as the intervention</li><li>● Non-English Language Articles and non-randomized, one-arm studies</li></ul> |
|----------|---------------------------------------------------------------------------------------------------------------------------------------------------------------------------------------------------------------------|
